# Supplementary material for: Negative Immune Regulator TIPE2 Promotes M2 Macrophage Differentiation through the Activation of PI3K-AKT Signaling Pathway
Source: PubMed Central journal article supplement (PMC5266285; doi:10.1371/journal.pone.0170666), 2017-01-25
Supplement: pone.0170666.s001.pdf [file pone.0170666.s001.pdf]

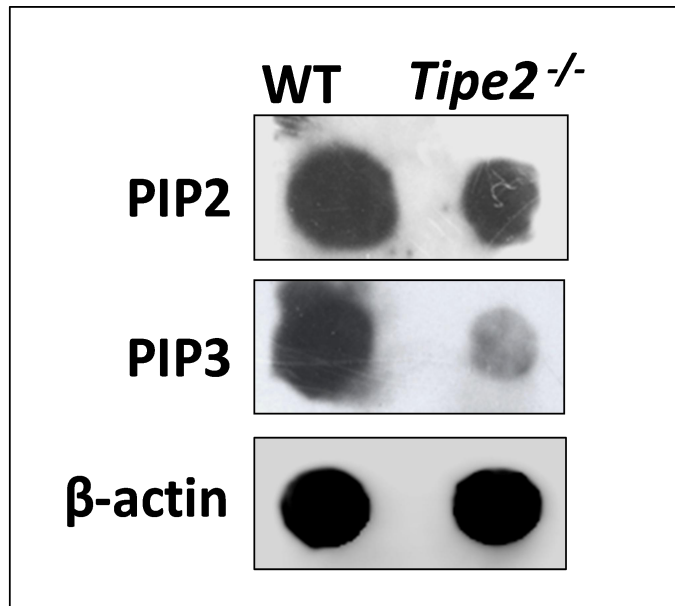

**S1 Fig . Cellular levels of PIP2 and PIP3 were significantly decreased by *Tipe2*-deficient macrophages under M1 macrophage-inducing condition.** Bone marrow derived macrophages from WT and *Tipe2*-deficient mice (n=3) were treated with IFN- $\gamma$  (50 ng/ml) and LPS (10 ng/ml) for 20 min. Cellular levels of PIP2 and PIP3 were estimated by dot blot with anti-PIP2 or anti-PIP3 antibody, respectively. Result is representative of three independent experiments.
