# Supplementary material for: Negative Immune Regulator TIPE2 Promotes M2 Macrophage Differentiation through the Activation of PI3K-AKT Signaling Pathway
Source: PubMed Central journal article supplement (PMC5266285; doi:10.1371/journal.pone.0170666), 2017-01-25
Supplement: pone.0170666.s002.pdf [file pone.0170666.s002.pdf]

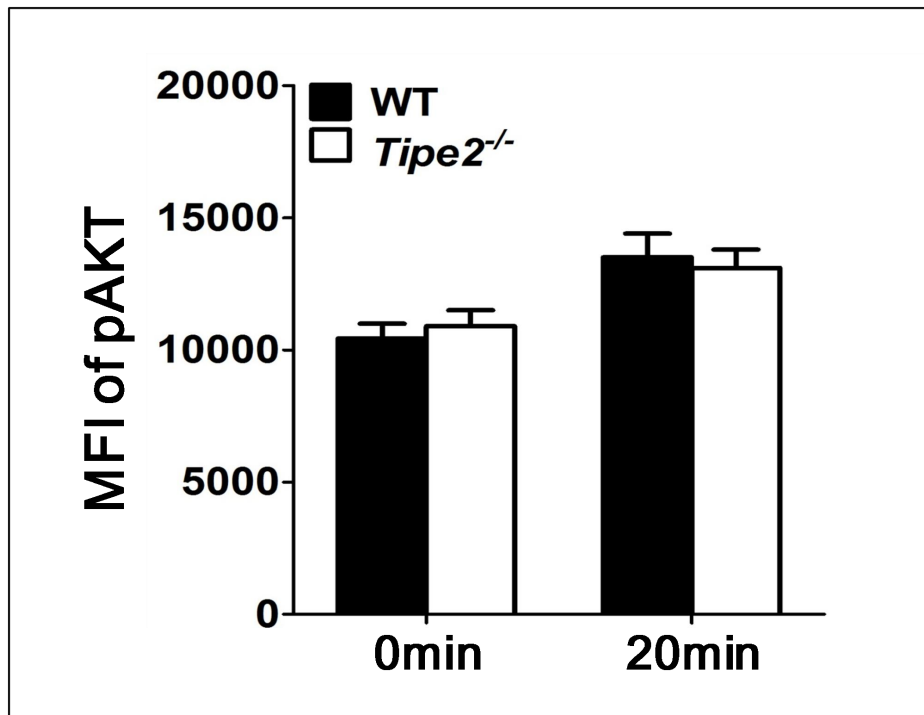

**S2 Fig. Phosphorylation of AKT is comparable between WT and *Tpe2*-deficient M1 macrophage.** Bone marrow derived macrophages from WT and *Tpe2*-deficient mice (n=3) were either untreated (0 min) or treated with IFN- $\gamma$  (50 ng/ml) and LPS (10 ng/ml) for 20 min (20 min). Cells were stained with anti-Phospho-AKT (T308) and analyzed by flow cytometry. The MFI (mean fluorescence intensity) of phosphorylated AKT (pAKT) was determined using FlowJo software. Result is representative of two independent experiments.
